# Supplementary material
Source: publisher figshare collection journal article supplement (https://gsajournals.figshare.com/ndownloader/files/13529357)
Supplement: Supplementary file 1 [file 13529357]

Line	y
Arsenio_002	5
Arsenio_005	3
Arsenio_007	4
Arsenio_010	3
Arsenio_011	3
Arsenio_012	6
Arsenio_016	4
Arsenio_017	7
Arsenio_020	9
Arsenio_021	9
Arsenio_025	2
Arsenio_026	4
Arsenio_027	2
Arsenio_029	2
Arsenio_030	1
Arsenio_031	2
Arsenio_032	1
Arsenio_033	9
Arsenio_035	2
Arsenio_036	2
Arsenio_039	5
Arsenio_040	4
Arsenio_041	2
Arsenio_042	2
Arsenio_044	9
Arsenio_045	2
Arsenio_046	4
Arsenio_047	1
Arsenio_049	2
Arsenio_050	7
Arsenio_051	7
Arsenio_052	3
Arsenio_053	4
Arsenio_054	2
Arsenio_055	9
Arsenio_057	2
Arsenio_058	1
Arsenio_059	2
Arsenio_060	5
Arsenio_061	6
Arsenio_062	3
Arsenio_063	1
Arsenio_064	1
Arsenio_065	2
Arsenio_066	7
Arsenio_067	2
Arsenio_068	8
Arsenio_069	2
Arsenio_070	3
Arsenio_071	9
Arsenio_072	4
Arsenio_073	0
Arsenio_074	2
Arsenio_075	5
Arsenio_076	2
Arsenio_078	3
Arsenio_079	7
Arsenio_080	1
Arsenio_082	9
Arsenio_083	9
Arsenio_084	2
Arsenio_085	2
Arsenio_087	5
Arsenio_088	8
Arsenio_089	9
Arsenio_090	4
Arsenio_091	4
Arsenio_092	1
Arsenio_093	9
Arsenio_094	9
Arsenio_095	2
Arsenio_096	4
Arsenio_097	2
Arsenio_098	1
Arsenio_099	8
Arsenio_101	3
Arsenio_102	1
Arsenio_104	2
Arsenio_106	7
Arsenio_107	2
Arsenio_108	2
Arsenio_109	2
Arsenio_110	2
Arsenio_111	4
Arsenio_112	3
Arsenio_113	2
Arsenio_114	6
Arsenio_116	1
Arsenio_117	5
Arsenio_119	9
Arsenio_120	3
Arsenio_121	3
Arsenio_122	3
Arsenio_124	3
Arsenio_125	6
Arsenio_126	7
Arsenio_127	2
Arsenio_128	2
Arsenio_129	2
Arsenio_130	1
Arsenio_131	3
Arsenio_132	8
Arsenio_133	1
Arsenio_134	2
Arsenio_135	8
Arsenio_136	6
Arsenio_137	3
Arsenio_138	2
Arsenio_139	4
Arsenio_140	3
Arsenio_142	4
Arsenio_143	1
Arsenio_145	7
Arsenio_146	2
Arsenio_147	1
Arsenio_149	NA
Arsenio_150	1
Arsenio_151	2
Arsenio_153	1
